# Supplementary material for: 4f-Metal Clusters Exhibiting Slow Relaxation of Magnetization: A {Dy7} Complex with An Hourglass-like Metal Topology
Source: MDPI journal article supplement (doi:10.3390/molecules25092191), 2020-05-07

# checkCIF/PLATON report

You have not supplied any structure factors. As a result the full set of tests cannot be run.

THIS REPORT IS FOR GUIDANCE ONLY. IF USED AS PART OF A REVIEW PROCEDURE FOR PUBLICATION, IT SHOULD NOT REPLACE THE EXPERTISE OF AN EXPERIENCED CRYSTALLOGRAPHIC REFEREE.

No syntax errors found.      CIF dictionary      Interpreting this report

## Datablock: LK15

---

Bond precision:    C-C = 0.0155 A

Wavelength=0.71073

Cell:                a=16.2248(14)        b=20.2271(17)        c=28.297(2)  
                      alpha=103.560(2)    beta=92.408(2)      gamma=104.177(2)  
Temperature:    100 K

|                | Calculated                             | Reported                                 |
|----------------|----------------------------------------|------------------------------------------|
| Volume         | 8703.9(12)                             | 8703.8(13)                               |
| Space group    | P -1                                   | P -1                                     |
| Hall group     | -P 1                                   | -P 1                                     |
|                | C147 H101.50 Cl8 Dy7 N10               |                                          |
| Moiety formula | O42.50, N O3, C2 H3 N,<br>2.75(C H4 O) | ?                                        |
| Sum formula    | C151.75 H115.50 Cl8 Dy7<br>N12 O48.25  | C3.99 H3.04 Cl0.21 Dy0.18<br>N0.32 O1.27 |
| Mr             | 4300.17                                | 113.16                                   |
| Dx,g cm-3      | 1.641                                  | 1.641                                    |
| Z              | 2                                      | 76                                       |
| Mu (mm-1)      | 3.167                                  | 3.167                                    |
| F000           | 4188.0                                 | 4188.0                                   |
| F000'          | 4189.53                                |                                          |
| h,k,lmax       | 20,24,34                               | 20,24,34                                 |
| Nref           | 34264                                  | 34234                                    |
| Tmin,Tmax      | 0.691,0.729                            | 0.450,0.742                              |
| Tmin'          | 0.383                                  |                                          |

Correction method= # Reported T Limits: Tmin=0.450 Tmax=0.742  
AbsCorr = ?

Data completeness= 0.999

Theta(max)= 26.022

R(reflections)= 0.0631( 25380)

wR2(reflections)= 0.1788( 34234)

S = 1.052

Npar= 2079

---

The following ALERTS were generated. Each ALERT has the format  
**test-name\_ALERT\_alert-type\_alert-level.**  
Click on the hyperlinks for more details of the test.

---

### Alert level A

SHFSU01\_ALERT\_2\_A The absolute value of parameter shift to su ratio > 0.20  
Absolute value of the parameter shift to su ratio given 6.902  
Additional refinement cycles may be required.

### Author Response: Multiple disorders and significant residual electron density around th

PLAT080\_ALERT\_2\_A Maximum Shift/Error ..... 6.90 Why ?

### Author Response: Multiple disorders and significant residual electron density around th

PLAT417\_ALERT\_2\_A Short Inter D-H..H-D H32A ..H53 . 0.97 Ang.  
x,y,z = 1\_555 Check

### Author Response: Multiple disorders and significant residual electron density around th

PLAT602\_ALERT\_2\_A VERY LARGE Solvent Accessible VOID(S) in Structure ! Info

### Author Response: Multiple solvent disorders - SQUEEZE (part of PLATON was used.

---

### Alert level B

PLAT201\_ALERT\_2\_B Isotropic non-H Atoms in Main Residue(s) ..... 3 Report  
O42 O43 C109  
PLAT220\_ALERT\_2\_B NonSolvent Resd 1 C Ueq(max) / Ueq(min) Range 7.0 Ratio  
PLAT420\_ALERT\_2\_B D-H Without Acceptor O39 --H39B . Please Check  
PLAT420\_ALERT\_2\_B D-H Without Acceptor O47 --H47' . Please Check  
PLAT420\_ALERT\_2\_B D-H Without Acceptor O54 --H54 . Please Check

---

### Alert level C

ABSMU01\_ALERT\_1\_C The ratio of given/expected absorption coefficient lies  
outside the range 0.99 <> 1.01  
Calculated value of mu = 3.100  
Value of mu given = 3.167  
PLAT041\_ALERT\_1\_C Calc. and Reported SumFormula Strings Differ Please Check  
PLAT052\_ALERT\_1\_C Info on Absorption Correction Method Not Given Please Do !  
PLAT094\_ALERT\_2\_C Ratio of Maximum / Minimum Residual Density .... 2.06 Report  
PLAT213\_ALERT\_2\_C Atom C11 has ADP max/min Ratio ..... 3.1 prolat  
PLAT215\_ALERT\_3\_C Disordered O44 has ADP max/min Ratio ..... 3.2 Note  
PLAT215\_ALERT\_3\_C Disordered N13 has ADP max/min Ratio ..... 3.3 Note  
PLAT220\_ALERT\_2\_C NonSolvent Resd 1 O Ueq(max) / Ueq(min) Range 5.5 Ratio  
PLAT222\_ALERT\_3\_C NonSolvent Resd 1 H Uiso(max)/Uiso(min) Range 7.9 Ratio  
PLAT242\_ALERT\_2\_C Low MainMol Ueq as Compared to Neighbors of O12 Check  
PLAT260\_ALERT\_2\_C Large Average Ueq of Residue Including O45 0.134 Check  
PLAT329\_ALERT\_4\_C Carbon Atom Hybridisation Unclear for ..... C109 Check  
PLAT342\_ALERT\_3\_C Low Bond Precision on C-C Bonds ..... 0.01548 Ang.  
PLAT369\_ALERT\_2\_C Long C(sp2)-C(sp2) Bond C124 - C130 . 1.53 Ang.  
PLAT369\_ALERT\_2\_C Long C(sp2)-C(sp2) Bond C131 - C132 . 1.53 Ang.

|                   |                           |      |         |   |             |
|-------------------|---------------------------|------|---------|---|-------------|
| PLAT410_ALERT_2_C | Short Intra H...H Contact | H80  | ..H83   | . | 1.99 Ang.   |
|                   |                           |      | x,y,z = |   | 1_555 Check |
| PLAT410_ALERT_2_C | Short Intra H...H Contact | H119 | ..H122  | . | 1.94 Ang.   |
|                   |                           |      | x,y,z = |   | 1_555 Check |

## ● Alert level G

CELLZ01\_ALERT\_1\_G Difference between formula and atom\_site contents detected.

CELLZ01\_ALERT\_1\_G ALERT: Large difference may be due to a

symmetry error - see SYMMG tests

From the CIF: \_cell\_formula\_units\_Z 76

From the CIF: \_chemical\_formula\_sum C3.99 H3.04 Cl0.21 Dy0.18 N0.32 O1

TEST: Compare cell contents of formula and atom\_site data

| atom | Z*formula | cif sites | diff  |
|------|-----------|-----------|-------|
| C    | 303.24    | 303.50    | -0.26 |
| H    | 231.04    | 231.00    | 0.04  |
| Cl   | 15.96     | 16.00     | -0.04 |
| Dy   | 13.68     | 14.00     | -0.32 |
| N    | 24.32     | 24.00     | 0.32  |
| O    | 96.52     | 96.50     | 0.02  |

|                   |                                                  |                |       |              |
|-------------------|--------------------------------------------------|----------------|-------|--------------|
| PLAT002_ALERT_2_G | Number of Distance or Angle Restraints on AtSite |                | 8     | Note         |
| PLAT003_ALERT_2_G | Number of Uiso or Uij Restrained non-H Atoms ... |                | 218   | Report       |
| PLAT007_ALERT_5_G | Number of Unrefined Donor-H Atoms .....          |                | 19    | Report       |
| PLAT012_ALERT_1_G | N.O.K. _shelx_res_checksum Found in CIF .....    |                |       | Please Check |
| PLAT013_ALERT_1_G | N.O.K. _shelx_hkl_checksum Found in CIF .....    |                |       | Please Check |
| PLAT045_ALERT_1_G | Calculated and Reported Z Differ by a Factor ... |                | 0.03  | Check        |
| PLAT083_ALERT_2_G | SHELXL Second Parameter in WGHT Unusually Large  |                | 79.47 | Why ?        |
| PLAT154_ALERT_1_G | The s.u.'s on the Cell Angles are Equal ..(Note) |                | 0.002 | Degree       |
| PLAT172_ALERT_4_G | The CIF-Embedded .res File Contains DFIX Records |                | 1     | Report       |
| PLAT177_ALERT_4_G | The CIF-Embedded .res File Contains DELU Records |                | 1     | Report       |
| PLAT187_ALERT_4_G | The CIF-Embedded .res File Contains RIGU Records |                | 1     | Report       |
| PLAT300_ALERT_4_G | Atom Site Occupancy of O44                       | Constrained at | 0.5   | Check        |
| PLAT300_ALERT_4_G | Atom Site Occupancy of N10                       | Constrained at | 0.5   | Check        |
| PLAT300_ALERT_4_G | Atom Site Occupancy of N13                       | Constrained at | 0.5   | Check        |
| PLAT300_ALERT_4_G | Atom Site Occupancy of H10A                      | Constrained at | 0.5   | Check        |
| PLAT300_ALERT_4_G | Atom Site Occupancy of H10B                      | Constrained at | 0.5   | Check        |
| PLAT300_ALERT_4_G | Atom Site Occupancy of H10C                      | Constrained at | 0.5   | Check        |
| PLAT300_ALERT_4_G | Atom Site Occupancy of O45                       | Constrained at | 0.5   | Check        |
| PLAT300_ALERT_4_G | Atom Site Occupancy of O55                       | Constrained at | 0.5   | Check        |
| PLAT300_ALERT_4_G | Atom Site Occupancy of O56                       | Constrained at | 0.5   | Check        |
| PLAT300_ALERT_4_G | Atom Site Occupancy of N14                       | Constrained at | 0.5   | Check        |
| PLAT300_ALERT_4_G | Atom Site Occupancy of O50                       | Constrained at | 0.5   | Check        |
| PLAT300_ALERT_4_G | Atom Site Occupancy of O51                       | Constrained at | 0.5   | Check        |
| PLAT300_ALERT_4_G | Atom Site Occupancy of O52                       | Constrained at | 0.5   | Check        |
| PLAT300_ALERT_4_G | Atom Site Occupancy of N12                       | Constrained at | 0.5   | Check        |
| PLAT300_ALERT_4_G | Atom Site Occupancy of O47                       | Constrained at | 0.5   | Check        |
| PLAT300_ALERT_4_G | Atom Site Occupancy of C2'                       | Constrained at | 0.5   | Check        |
| PLAT300_ALERT_4_G | Atom Site Occupancy of H15G                      | Constrained at | 0.5   | Check        |
| PLAT300_ALERT_4_G | Atom Site Occupancy of H15H                      | Constrained at | 0.5   | Check        |
| PLAT300_ALERT_4_G | Atom Site Occupancy of H15I                      | Constrained at | 0.5   | Check        |
| PLAT300_ALERT_4_G | Atom Site Occupancy of H47'                      | Constrained at | 0.5   | Check        |
| PLAT300_ALERT_4_G | Atom Site Occupancy of O49                       | Constrained at | 0.5   | Check        |
| PLAT300_ALERT_4_G | Atom Site Occupancy of C154                      | Constrained at | 0.5   | Check        |
| PLAT300_ALERT_4_G | Atom Site Occupancy of H15M                      | Constrained at | 0.5   | Check        |
| PLAT300_ALERT_4_G | Atom Site Occupancy of H15N                      | Constrained at | 0.5   | Check        |
| PLAT300_ALERT_4_G | Atom Site Occupancy of H15O                      | Constrained at | 0.5   | Check        |
| PLAT300_ALERT_4_G | Atom Site Occupancy of H49'                      | Constrained at | 0.5   | Check        |
| PLAT300_ALERT_4_G | Atom Site Occupancy of O54                       | Constrained at | 0.5   | Check        |
| PLAT300_ALERT_4_G | Atom Site Occupancy of C1'                       | Constrained at | 0.5   | Check        |
| PLAT300_ALERT_4_G | Atom Site Occupancy of H1'1                      | Constrained at | 0.5   | Check        |

|                   |                                                |                |       |       |
|-------------------|------------------------------------------------|----------------|-------|-------|
| PLAT300_ALERT_4_G | Atom Site Occupancy of H1'2                    | Constrained at | 0.5   | Check |
| PLAT300_ALERT_4_G | Atom Site Occupancy of H1'3                    | Constrained at | 0.5   | Check |
| PLAT300_ALERT_4_G | Atom Site Occupancy of H54                     | Constrained at | 0.5   | Check |
| PLAT300_ALERT_4_G | Atom Site Occupancy of O46                     | Constrained at | 0.25  | Check |
| PLAT300_ALERT_4_G | Atom Site Occupancy of C129                    | Constrained at | 0.25  | Check |
| PLAT300_ALERT_4_G | Atom Site Occupancy of H12A                    | Constrained at | 0.25  | Check |
| PLAT300_ALERT_4_G | Atom Site Occupancy of H12B                    | Constrained at | 0.25  | Check |
| PLAT300_ALERT_4_G | Atom Site Occupancy of H12C                    | Constrained at | 0.25  | Check |
| PLAT300_ALERT_4_G | Atom Site Occupancy of H46                     | Constrained at | 0.25  | Check |
| PLAT301_ALERT_3_G | Main Residue Disorder .....(Resd 1 )           |                | 1%    | Note  |
| PLAT302_ALERT_4_G | Anion/Solvent/Minor-Residue Disorder (Resd 2 ) |                | 100%  | Note  |
| PLAT302_ALERT_4_G | Anion/Solvent/Minor-Residue Disorder (Resd 3 ) |                | 100%  | Note  |
| PLAT302_ALERT_4_G | Anion/Solvent/Minor-Residue Disorder (Resd 5 ) |                | 100%  | Note  |
| PLAT302_ALERT_4_G | Anion/Solvent/Minor-Residue Disorder (Resd 6 ) |                | 100%  | Note  |
| PLAT302_ALERT_4_G | Anion/Solvent/Minor-Residue Disorder (Resd 8 ) |                | 100%  | Note  |
| PLAT302_ALERT_4_G | Anion/Solvent/Minor-Residue Disorder (Resd 9 ) |                | 100%  | Note  |
| PLAT304_ALERT_4_G | Non-Integer Number of Atoms in ..... (Resd 9 ) |                | 1.50  | Check |
| PLAT333_ALERT_2_G | Large Aver C6-Ring C-C Dist C1 -C10            |                | 1.42  | Ang.  |
| PLAT333_ALERT_2_G | Large Aver C6-Ring C-C Dist C112 -C121         |                | 1.43  | Ang.  |
| PLAT412_ALERT_2_G | Short Intra XH3 .. XHn H01C ..H10A             |                | 1.67  | Ang.  |
|                   | x,y,z =                                        | 1_555          | Check |       |
| PLAT413_ALERT_2_G | Short Inter XH3 .. XHn H150 ..H69              |                | 1.77  | Ang.  |
|                   | x,l+y,z =                                      | 1_565          | Check |       |
| PLAT413_ALERT_2_G | Short Inter XH3 .. XHn H1'3 ..H41              |                | 2.11  | Ang.  |
|                   | 1+x,y,z =                                      | 1_655          | Check |       |
| PLAT414_ALERT_2_G | Short Intra D-H..H-X H10B ..H39A               |                | 1.98  | Ang.  |
|                   | x,y,z =                                        | 1_555          | Check |       |
| PLAT417_ALERT_2_G | Short Inter D-H..H-D H25B ..H49'               |                | 0.89  | Ang.  |
|                   | x,y,z =                                        | 1_555          | Check |       |

### Author Response: Multiple disorders and significant residual electron density around th

|                   |                                             |       |       |       |
|-------------------|---------------------------------------------|-------|-------|-------|
| PLAT431_ALERT_2_G | Short Inter HL..A Contact C14 ..O42         |       | 3.09  | Ang.  |
|                   | 1-x,-y,1-z =                                | 2_656 | Check |       |
| PLAT432_ALERT_2_G | Short Inter X...Y Contact C16 ..C2'         |       | 3.22  | Ang.  |
|                   | 1-x,1-y,2-z =                               | 2_667 | Check |       |
| PLAT432_ALERT_2_G | Short Inter X...Y Contact C42 ..C92         |       | 3.19  | Ang.  |
|                   | -1+x,y,z =                                  | 1_455 | Check |       |
| PLAT720_ALERT_4_G | Number of Unusual/Non-Standard Labels ..... |       | 8     | Note  |
| PLAT721_ALERT_1_G | Bond Calc 0.98000, Rep 1.11360 Dev...       |       | 0.13  | Ang.  |
|                   | C1' -H1'1 1.555 1.555 .....                 | #     | 13    | Check |
| PLAT721_ALERT_1_G | Bond Calc 0.97000, Rep 1.10930 Dev...       |       | 0.14  | Ang.  |
|                   | C1' -H1'2 1.555 1.555 .....                 | #     | 14    | Check |
| PLAT721_ALERT_1_G | Bond Calc 0.99000, Rep 1.11780 Dev...       |       | 0.13  | Ang.  |
|                   | C1' -H1'3 1.555 1.555 .....                 | #     | 15    | Check |
| PLAT721_ALERT_1_G | Bond Calc 0.94000, Rep 0.97350 Dev...       |       | 0.03  | Ang.  |
|                   | O46 -H46 1.555 1.555 .....                  | #     | 131   | Check |
| PLAT721_ALERT_1_G | Bond Calc 0.95000, Rep 0.96050 Dev...       |       | 0.01  | Ang.  |
|                   | O54 -H54 1.555 1.555 .....                  | #     | 142   | Check |
| PLAT721_ALERT_1_G | Bond Calc 0.98000, Rep 1.00560 Dev...       |       | 0.03  | Ang.  |
|                   | C109 -H10A 1.555 1.555 .....                | #     | 342   | Check |
| PLAT721_ALERT_1_G | Bond Calc 0.98000, Rep 1.00600 Dev...       |       | 0.03  | Ang.  |
|                   | C109 -H10B 1.555 1.555 .....                | #     | 343   | Check |
| PLAT721_ALERT_1_G | Bond Calc 0.98000, Rep 1.00600 Dev...       |       | 0.03  | Ang.  |
|                   | C109 -H10C 1.555 1.555 .....                | #     | 344   | Check |
| PLAT721_ALERT_1_G | Bond Calc 0.98000, Rep 0.99780 Dev...       |       | 0.02  | Ang.  |
|                   | C129 -H12A 1.555 1.555 .....                | #     | 377   | Check |
| PLAT721_ALERT_1_G | Bond Calc 0.99000, Rep 1.00690 Dev...       |       | 0.02  | Ang.  |
|                   | C129 -H12B 1.555 1.555 .....                | #     | 378   | Check |
| PLAT721_ALERT_1_G | Bond Calc 0.97000, Rep 1.00390 Dev...       |       | 0.03  | Ang.  |

|                   |                                         |                 |         |       |        |        |       |               |
|-------------------|-----------------------------------------|-----------------|---------|-------|--------|--------|-------|---------------|
| C129              | -H12C                                   |                 | 1.555   | 1.555 | .....  | #      | 379   | Check         |
| PLAT722_ALERT_1_G | Angle                                   | Calc            | 109.00, | Rep   | 123.50 | Dev... |       | 14.50 Degree  |
| O54               | -C1'                                    | -H1'1           | 1.555   | 1.555 | 1.555  | #      | 56    | Check         |
| PLAT722_ALERT_1_G | Angle                                   | Calc            | 110.00, | Rep   | 124.10 | Dev... |       | 14.10 Degree  |
| O54               | -C1'                                    | -H1'2           | 1.555   | 1.555 | 1.555  | #      | 57    | Check         |
| PLAT722_ALERT_1_G | Angle                                   | Calc            | 110.00, | Rep   | 92.30  | Dev... |       | 17.70 Degree  |
| H1'1              | -C1'                                    | -H1'2           | 1.555   | 1.555 | 1.555  | #      | 58    | Check         |
| PLAT722_ALERT_1_G | Angle                                   | Calc            | 109.00, | Rep   | 124.20 | Dev... |       | 15.20 Degree  |
| O54               | -C1'                                    | -H1'3           | 1.555   | 1.555 | 1.555  | #      | 59    | Check         |
| PLAT722_ALERT_1_G | Angle                                   | Calc            | 109.00, | Rep   | 91.80  | Dev... |       | 17.20 Degree  |
| H1'1              | -C1'                                    | -H1'3           | 1.555   | 1.555 | 1.555  | #      | 60    | Check         |
| PLAT722_ALERT_1_G | Angle                                   | Calc            | 110.00, | Rep   | 91.50  | Dev... |       | 18.50 Degree  |
| H1'2              | -C1'                                    | -H1'3           | 1.555   | 1.555 | 1.555  | #      | 61    | Check         |
| PLAT722_ALERT_1_G | Angle                                   | Calc            | 109.00, | Rep   | 54.50  | Dev... |       | 54.50 Degree  |
| DY6               | -O4                                     | -H4'            | 1.555   | 1.555 | 1.555  | #      | 436   | Check         |
| PLAT722_ALERT_1_G | Angle                                   | Calc            | 111.00, | Rep   | 51.80  | Dev... |       | 59.20 Degree  |
| DY2               | -O4                                     | -H4'            | 1.555   | 1.555 | 1.555  | #      | 437   | Check         |
| PLAT722_ALERT_1_G | Angle                                   | Calc            | 113.00, | Rep   | 44.90  | Dev... |       | 68.10 Degree  |
| DY3               | -O8                                     | -H8''           | 1.555   | 1.555 | 1.555  | #      | 448   | Check         |
| PLAT722_ALERT_1_G | Angle                                   | Calc            | 108.00, | Rep   | 60.90  | Dev... |       | 47.10 Degree  |
| DY6               | -O8                                     | -H8''           | 1.555   | 1.555 | 1.555  | #      | 449   | Check         |
| PLAT722_ALERT_1_G | Angle                                   | Calc            | 121.00, | Rep   | 117.50 | Dev... |       | 3.50 Degree   |
| C129              | -O46                                    | -H46            | 1.555   | 1.555 | 1.555  | #      | 502   | Check         |
| PLAT722_ALERT_1_G | Angle                                   | Calc            | 119.00, | Rep   | 120.60 | Dev... |       | 1.60 Degree   |
| C154              | -O49                                    | -H49'           | 1.555   | 1.555 | 1.555  | #      | 505   | Check         |
| PLAT722_ALERT_1_G | Angle                                   | Calc            | 108.00, | Rep   | 20.60  | Dev... |       | 87.40 Degree  |
| C48               | -N2                                     | -H2'            | 1.555   | 1.555 | 1.555  | #      | 513   | Check         |
| PLAT722_ALERT_1_G | Angle                                   | Calc            | 112.00, | Rep   | 8.30   | Dev... |       | 103.70 Degree |
| C61               | -N5                                     | -H5'            | 1.555   | 1.555 | 1.555  | #      | 522   | Check         |
| PLAT722_ALERT_1_G | Angle                                   | Calc            | 112.00, | Rep   | 8.70   | Dev... |       | 103.30 Degree |
| C79               | -N6                                     | -H6'            | 1.555   | 1.555 | 1.555  | #      | 525   | Check         |
| PLAT722_ALERT_1_G | Angle                                   | Calc            | 109.00, | Rep   | 111.80 | Dev... |       | 2.80 Degree   |
| O12               | -C109                                   | -H10A           | 1.555   | 1.555 | 1.555  | #      | 874   | Check         |
| PLAT722_ALERT_1_G | Angle                                   | Calc            | 109.00, | Rep   | 112.00 | Dev... |       | 3.00 Degree   |
| O12               | -C109                                   | -H10B           | 1.555   | 1.555 | 1.555  | #      | 875   | Check         |
| PLAT722_ALERT_1_G | Angle                                   | Calc            | 109.00, | Rep   | 106.80 | Dev... |       | 2.20 Degree   |
| H10A              | -C109                                   | -H10B           | 1.555   | 1.555 | 1.555  | #      | 876   | Check         |
| PLAT722_ALERT_1_G | Angle                                   | Calc            | 110.00, | Rep   | 112.00 | Dev... |       | 2.00 Degree   |
| O12               | -C109                                   | -H10C           | 1.555   | 1.555 | 1.555  | #      | 877   | Check         |
| PLAT722_ALERT_1_G | Angle                                   | Calc            | 109.00, | Rep   | 106.90 | Dev... |       | 2.10 Degree   |
| H10A              | -C109                                   | -H10C           | 1.555   | 1.555 | 1.555  | #      | 878   | Check         |
| PLAT722_ALERT_1_G | Angle                                   | Calc            | 110.00, | Rep   | 106.90 | Dev... |       | 3.10 Degree   |
| H10B              | -C109                                   | -H10C           | 1.555   | 1.555 | 1.555  | #      | 879   | Check         |
| PLAT722_ALERT_1_G | Angle                                   | Calc            | 109.00, | Rep   | 113.70 | Dev... |       | 4.70 Degree   |
| O46               | -C129                                   | -H12B           | 1.555   | 1.555 | 1.555  | #      | 938   | Check         |
| PLAT722_ALERT_1_G | Angle                                   | Calc            | 109.00, | Rep   | 107.80 | Dev... |       | 1.20 Degree   |
| H12A              | -C129                                   | -H12B           | 1.555   | 1.555 | 1.555  | #      | 939   | Check         |
| PLAT722_ALERT_1_G | Angle                                   | Calc            | 110.00, | Rep   | 112.40 | Dev... |       | 2.40 Degree   |
| O46               | -C129                                   | -H12C           | 1.555   | 1.555 | 1.555  | #      | 940   | Check         |
| PLAT722_ALERT_1_G | Angle                                   | Calc            | 110.00, | Rep   | 106.70 | Dev... |       | 3.30 Degree   |
| H12A              | -C129                                   | -H12C           | 1.555   | 1.555 | 1.555  | #      | 941   | Check         |
| PLAT722_ALERT_1_G | Angle                                   | Calc            | 110.00, | Rep   | 106.50 | Dev... |       | 3.50 Degree   |
| H12B              | -C129                                   | -H12C           | 1.555   | 1.555 | 1.555  | #      | 942   | Check         |
| PLAT779_ALERT_4_G | Suspect or Irrelevant (Bond)            | Angle(s) in CIF | #       |       |        |        | 448   | Check         |
| DY3               | -O8                                     | -H8''           | 1.555   | 1.555 | 1.555  |        | 44.90 | Deg.          |
| PLAT779_ALERT_4_G | Suspect or Irrelevant (Bond)            | Angle(s) in CIF | #       |       |        |        | 513   | Check         |
| C48               | -N2                                     | -H2'            | 1.555   | 1.555 | 1.555  |        | 20.60 | Deg.          |
| PLAT779_ALERT_4_G | Suspect or Irrelevant (Bond)            | Angle(s) in CIF | #       |       |        |        | 522   | Check         |
| C61               | -N5                                     | -H5'            | 1.555   | 1.555 | 1.555  |        | 8.30  | Deg.          |
| PLAT779_ALERT_4_G | Suspect or Irrelevant (Bond)            | Angle(s) in CIF | #       |       |        |        | 525   | Check         |
| C79               | -N6                                     | -H6'            | 1.555   | 1.555 | 1.555  |        | 8.70  | Deg.          |
| PLAT790_ALERT_4_G | Centre of Gravity not Within Unit Cell: | Resd.           | #       |       |        |        | 8     | Note          |

#### C H4 O

|                   |                                                  |       |   |      |             |
|-------------------|--------------------------------------------------|-------|---|------|-------------|
| PLAT794_ALERT_5_G | Tentative Bond Valency for Dy4                   | (III) | . | 3.01 | Info        |
| PLAT794_ALERT_5_G | Tentative Bond Valency for Dy5                   | (III) | . | 2.88 | Info        |
| PLAT794_ALERT_5_G | Tentative Bond Valency for Dy6                   | (III) | . | 3.02 | Info        |
| PLAT802_ALERT_4_G | CIF Input Record(s) with more than 80 Characters |       |   | 3    | Info        |
| PLAT860_ALERT_3_G | Number of Least-Squares Restraints .....         |       |   | 3396 | Note        |
| PLAT883_ALERT_1_G | No Info/Value for _atom_sites_solution_primary   |       |   |      | Please Do ! |

---

4 **ALERT level A** = Most likely a serious problem - resolve or explain  
 5 **ALERT level B** = A potentially serious problem, consider carefully  
 17 **ALERT level C** = Check. Ensure it is not caused by an omission or oversight  
 118 **ALERT level G** = General information/check it is not something unexpected

47 ALERT type 1 CIF construction/syntax error, inconsistent or missing data  
 31 ALERT type 2 Indicator that the structure model may be wrong or deficient  
 6 ALERT type 3 Indicator that the structure quality may be low  
 56 ALERT type 4 Improvement, methodology, query or suggestion  
 4 ALERT type 5 Informative message, check

---

It is advisable to attempt to resolve as many as possible of the alerts in all categories. Often the minor alerts point to easily fixed oversights, errors and omissions in your CIF or refinement strategy, so attention to these fine details can be worthwhile. In order to resolve some of the more serious problems it may be necessary to carry out additional measurements or structure refinements. However, the purpose of your study may justify the reported deviations and the more serious of these should normally be commented upon in the discussion or experimental section of a paper or in the "special\_details" fields of the CIF. checkCIF was carefully designed to identify outliers and unusual parameters, but every test has its limitations and alerts that are not important in a particular case may appear. Conversely, the absence of alerts does not guarantee there are no aspects of the results needing attention. It is up to the individual to critically assess their own results and, if necessary, seek expert advice.

#### Publication of your CIF in IUCr journals

A basic structural check has been run on your CIF. These basic checks will be run on all CIFs submitted for publication in IUCr journals (*Acta Crystallographica*, *Journal of Applied Crystallography*, *Journal of Synchrotron Radiation*); however, if you intend to submit to *Acta Crystallographica Section C* or *E* or *IUCrData*, you should make sure that full publication checks are run on the final version of your CIF prior to submission.

#### Publication of your CIF in other journals

Please refer to the *Notes for Authors* of the relevant journal for any special instructions relating to CIF submission.

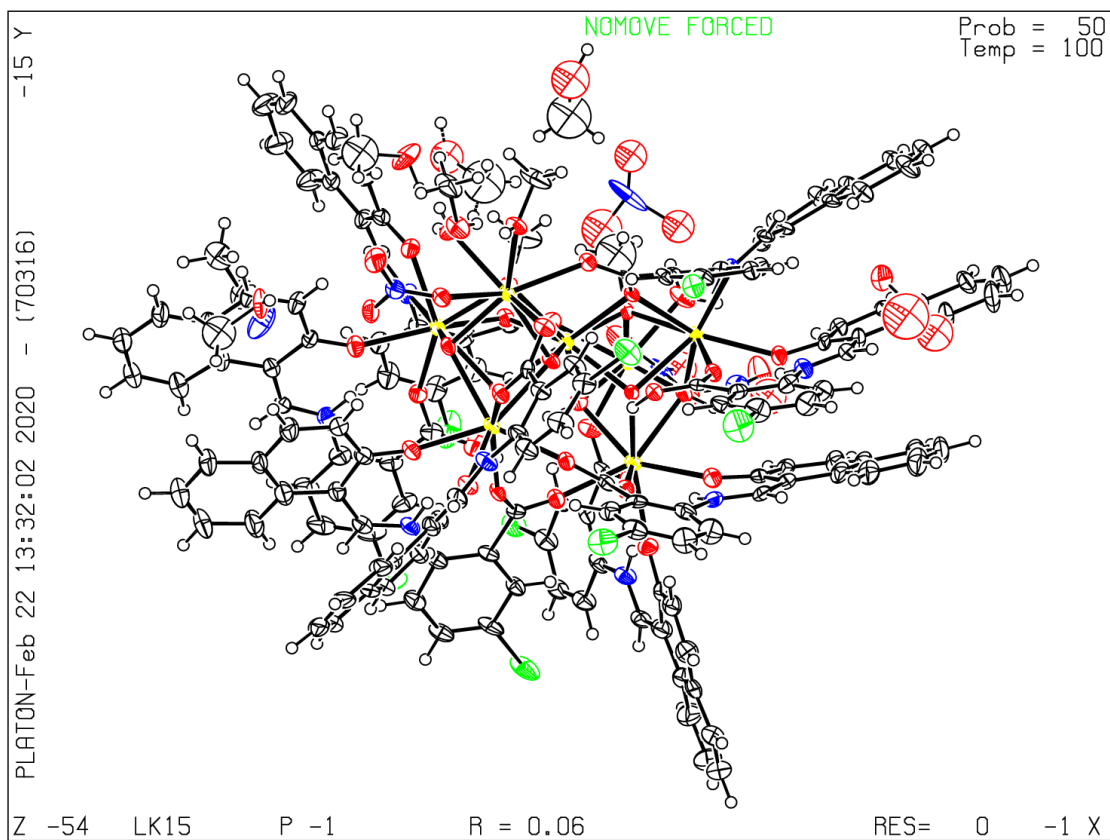

Supplement: s1 [file s1]
